# Supplementary material
Source: Springer Nature journal article supplement (https://www.springermedizin.de/resource/supplementary/12891_2008_656_MOESM2_ESM.pdf/9506484)

**FBR beginning of the contraction**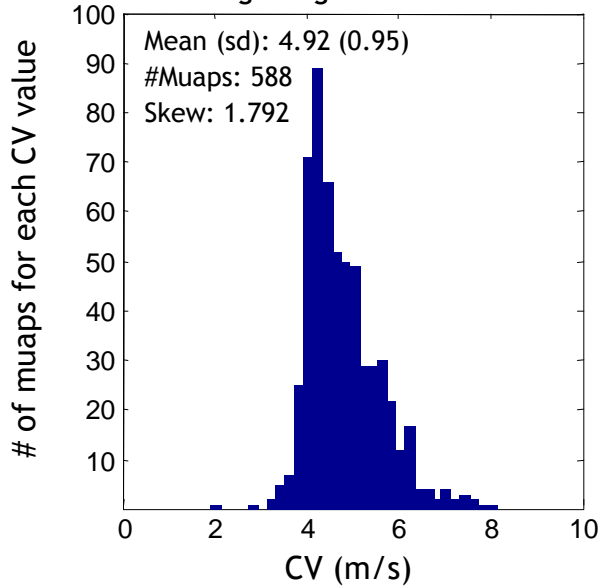**FBR end of the contraction**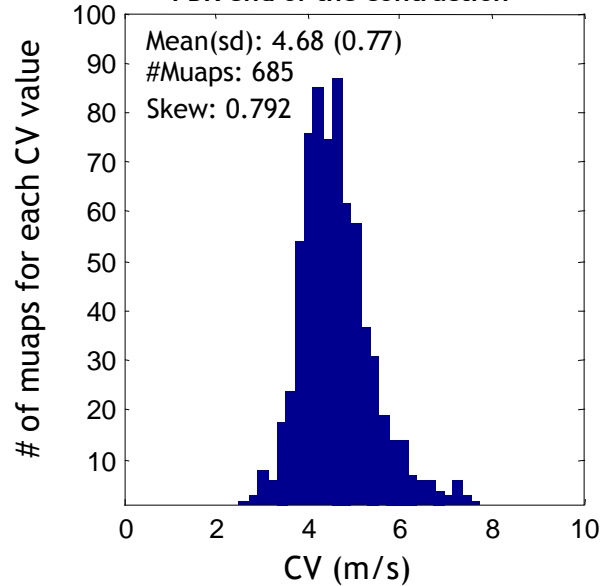**MCG beginning of contraction**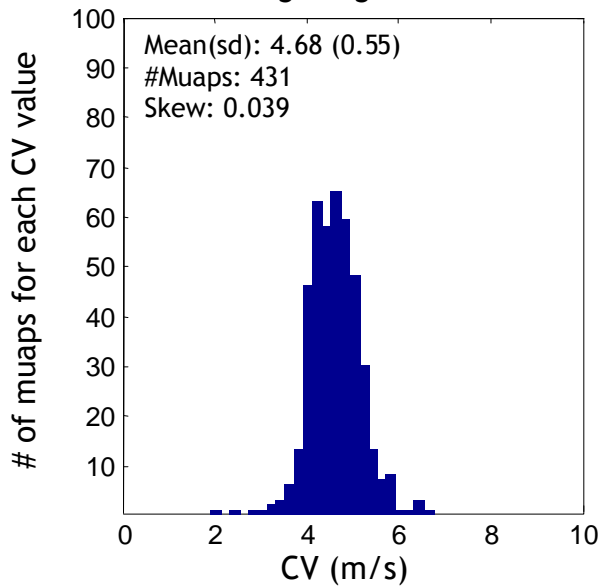**MCG end of contraction**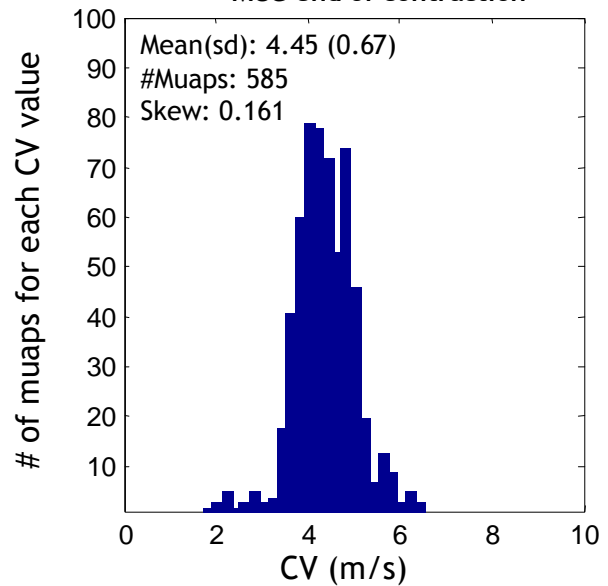

Supplement: MOESM2 [file 9506484]
